# Supplementary material
Source: PubMed Central journal article supplement (PMC8484360)

# Supplementary Fig. 1

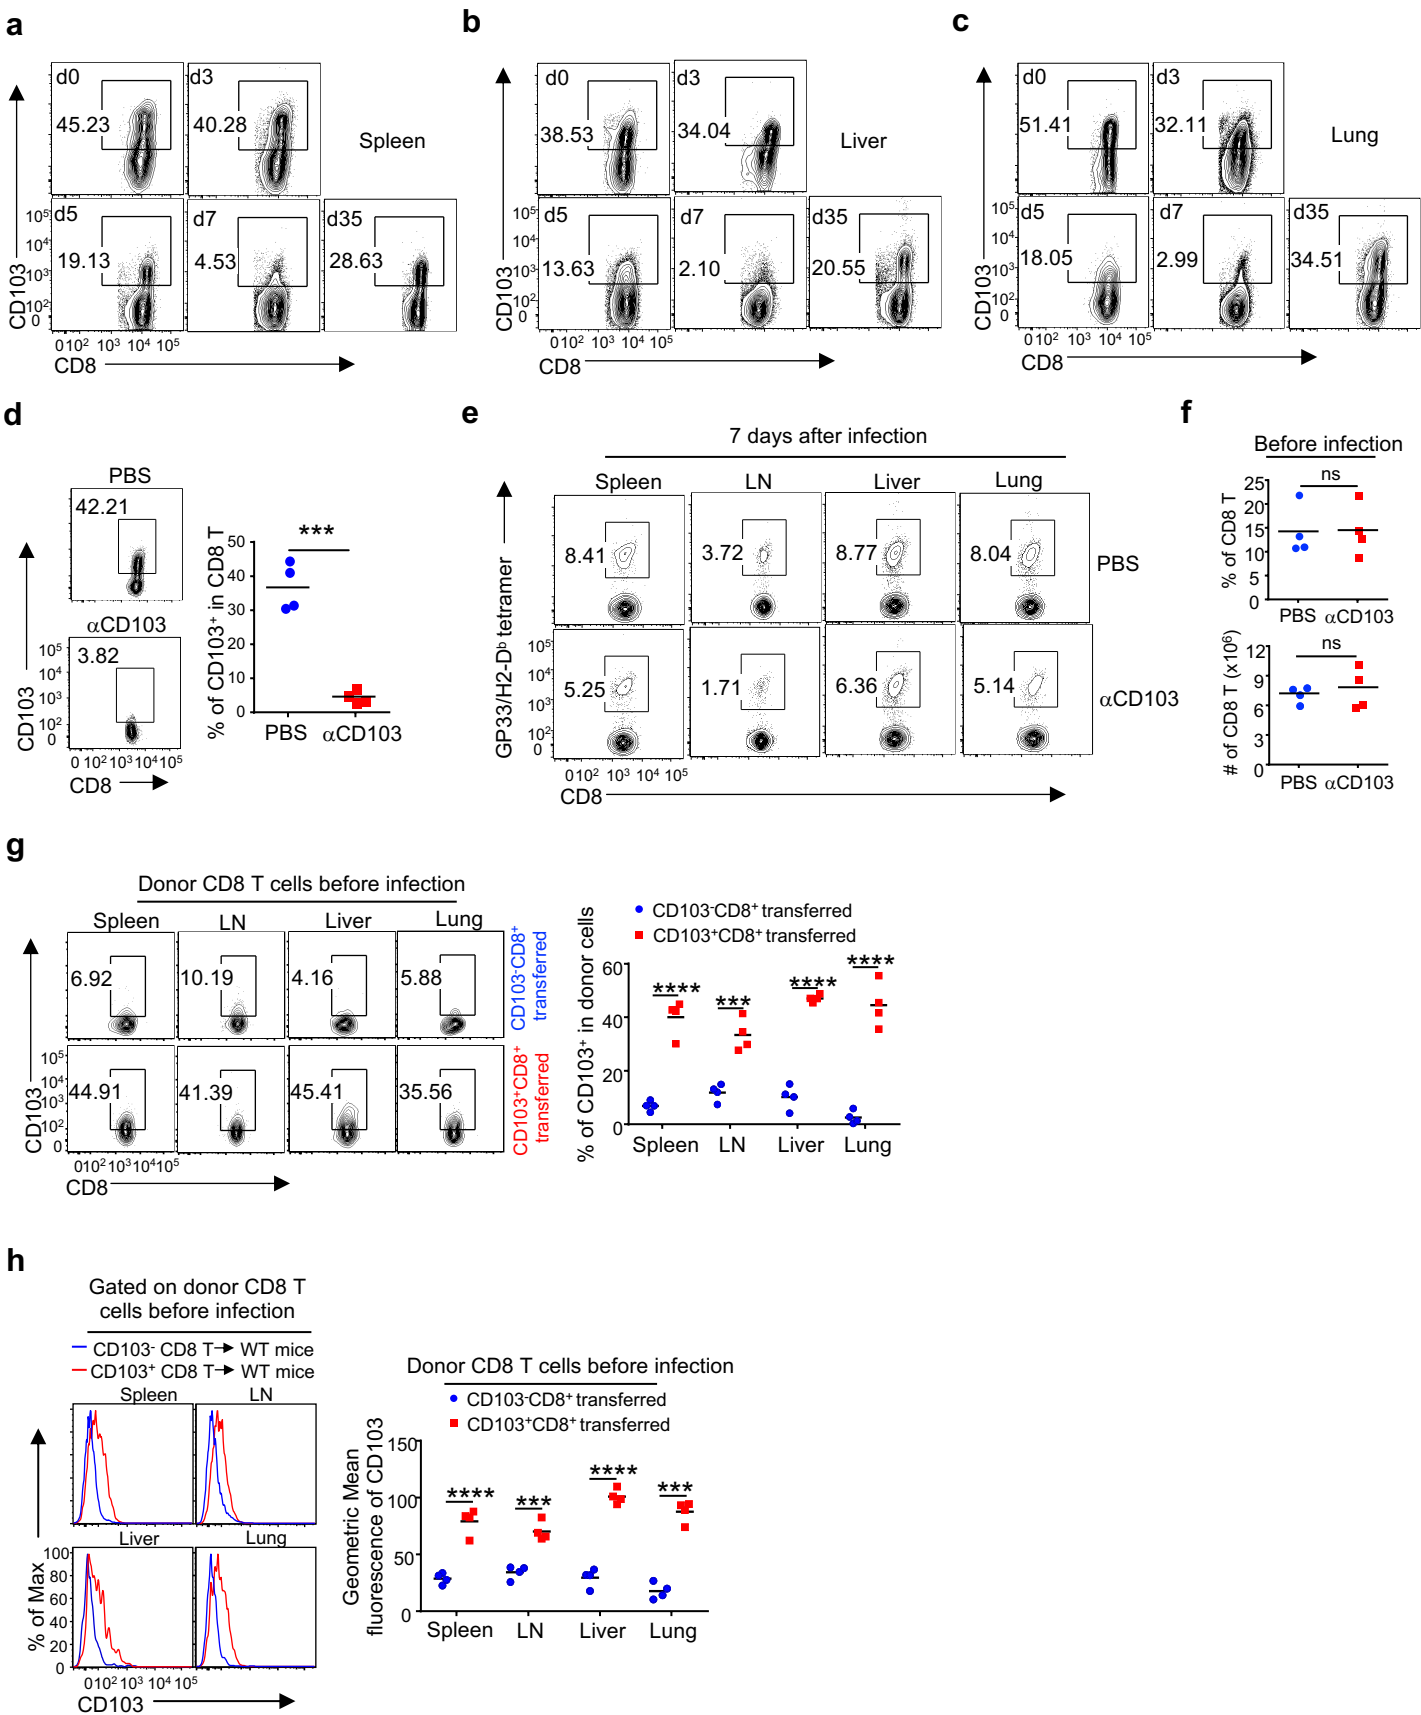

# Supplementary Fig. 2

**a**

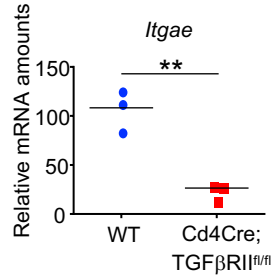

**b**

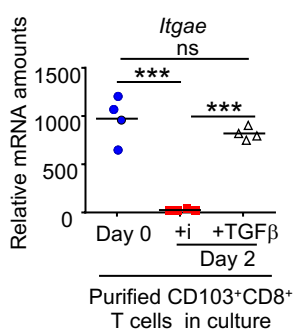

**c**

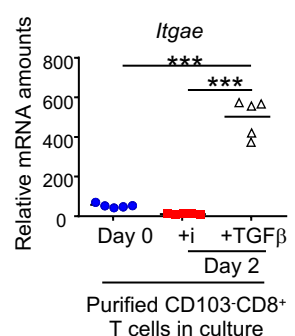

**Supplementary Fig. 3**

**a** **b**

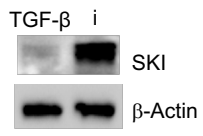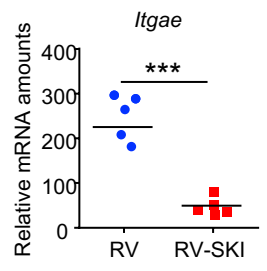

# Supplementary Fig. 4

**a**

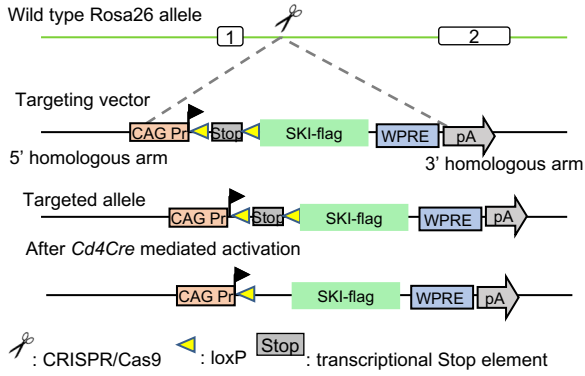

**b**

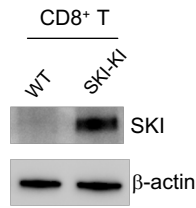

**c**

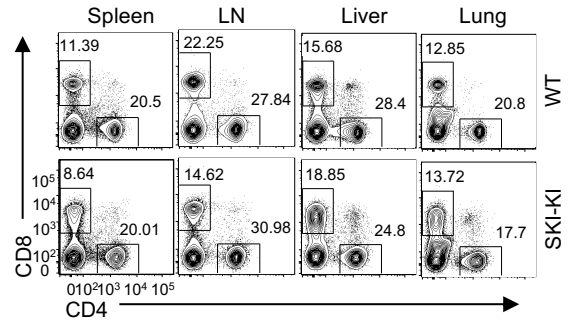

**d**

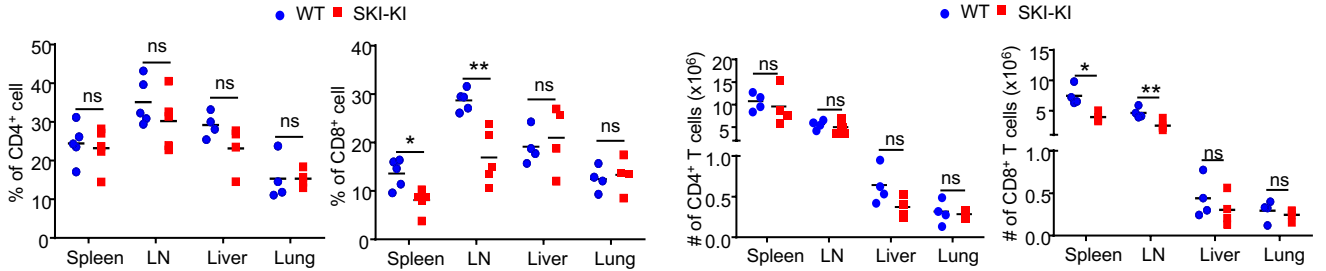

**e**

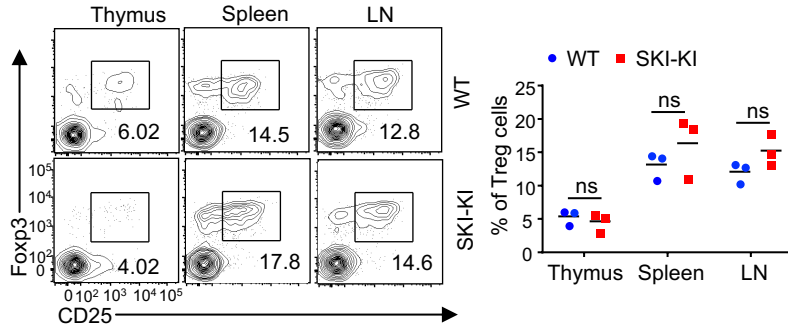

# Supplementary Fig. 5

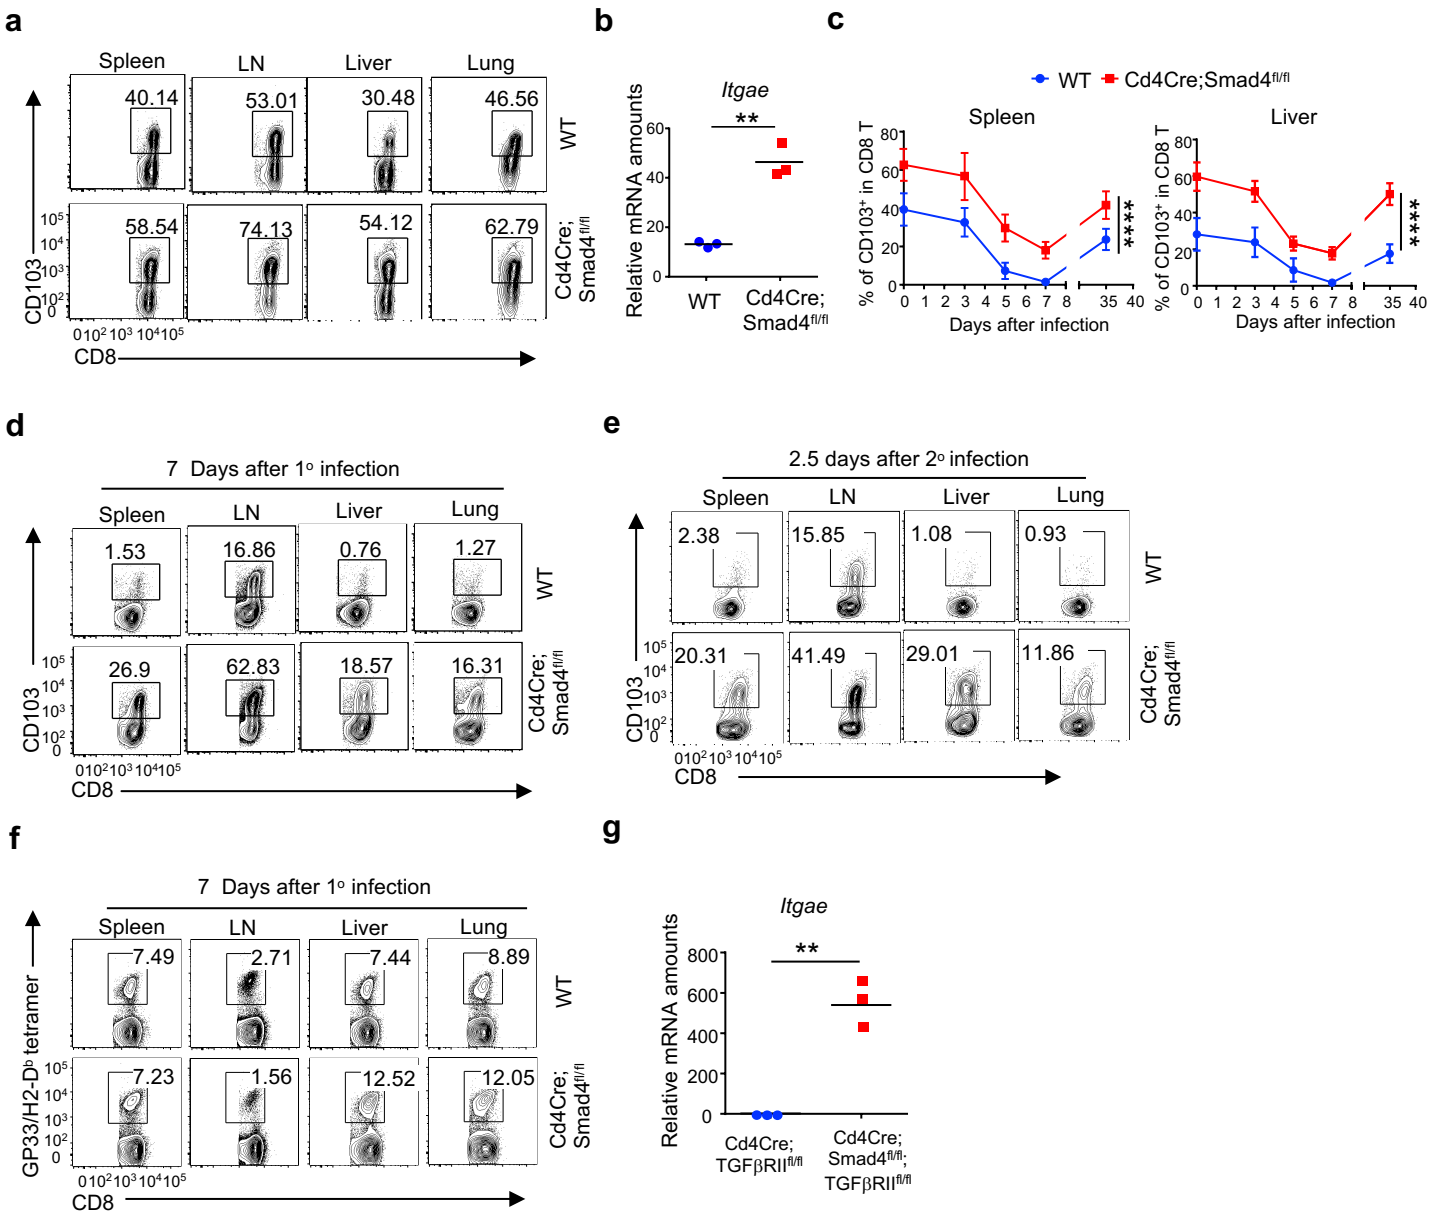

Supplement: 41423_2020_495_MOESM1_ESM.pdf [file 41423_2020_495_MOESM1_ESM.pdf]
